# Supplementary material
Source: Research Square preprint supplement (doi:10.21203/rs.3.rs-10307012/v1)
Supplement: Supplementary file 1 [file 5ff41dc265ed3628222c1015.docx]

# Appendix A. Measurement Transparency Notes for the Next Version

Before journal submission or a formal policy working-paper release, the author should add a short codebook or replication appendix with the following details:

- Exact ACS release, table IDs, and years used for each tract indicator.
- Exact racial and ethnic categories used to calculate the diversity index, including treatment of Hispanic ethnicity and non-Hispanic race categories.
- Formula for the normalized Shannon diversity index and handling of zero or missing group counts.
- Whether tract estimates are unweighted tract means, population-weighted means, household-weighted means, or renter-household-weighted means.
- Spatial allocation rule for NYCHA developments crossing tract boundaries and any sensitivity checks.
- Treatment of PACT/RAD conversions and mixed program developments.
- Definition of rent burden, severe rent burden, overcrowding, vacancy, and renter share denominators.
- R version and package versions used for spatial processing and data aggregation.
- A public repository folder containing the final analysis dataset, code, table outputs, and source inventory, with any restricted administrative records excluded.

# Appendix B. Access Pipeline Variables for FOIL or Administrative Data

| **Pipeline stage** | **Core variables** | **Why it matters** |
| --- | --- | --- |
| Need / demand | Applications; active waiting-list counts; certified waitlist; bedroom-size need; borough/development preference | Shows demand and list pressure, but not access by itself. |
| Eligibility / screening | Eligibility review dates or counts; certification; priority category; removals; updates | Shows whether applicants move from list position to readiness for an offer. |
| Offer / matching | Offers; refusals; nonresponses; matched units; offer-to-lease outcomes | Shows whether administrative matching converts eligibility into a real housing opportunity. |
| Unit readiness / turnover | Vacancies; off-rent-roll units; units under repair; lead/asbestos abatement; turnaround days | Shows whether apartments can be made available for occupancy. |
| Move-in / habitability / security | Admissions; lease-ups; move-ins; repair completion; resident transfers; security of vacant units | Shows whether public housing stock becomes lived housing. |
